# Supplementary material for: Implementation and validation of a supermodelling framework into CESM version 2.1.5
Source: Copernicus journal article supplement (doi:10.5194/egusphere-2024-2682), 2024-10-22
Supplement: Supplementary file 1 [file egusphere-2024-2682-supplement.pdf]

# Supplemental Information for: Implementation and validation of a supermodelling framework into CESM version 2.1.5

William E. Chapman <sup>1</sup>, Francine Schevenhoven <sup>2</sup>, Judith Berner <sup>1</sup>, Noel Keenlyside <sup>2</sup>, Ingo Bethke <sup>2</sup>, Ping-Gin Chiu <sup>2</sup>, Alok Kumar Gupta <sup>2</sup>, and Jesse Nusbaumer <sup>1</sup>

<sup>1</sup>National Center for Atmospheric Research, Boulder, Co. USA

<sup>2</sup>Geophysical Institute and Bjerknes Centre for Climate Research, University of Bergen,

**Correspondence:** William E. Chapman (wchapman@ucar.edu)

**Abstract.** Here we present supplemental information for the manuscript: Implementation and validation of a supermodelling framework into CESM version 2.1.5. All figures are referenced in the main manuscript.

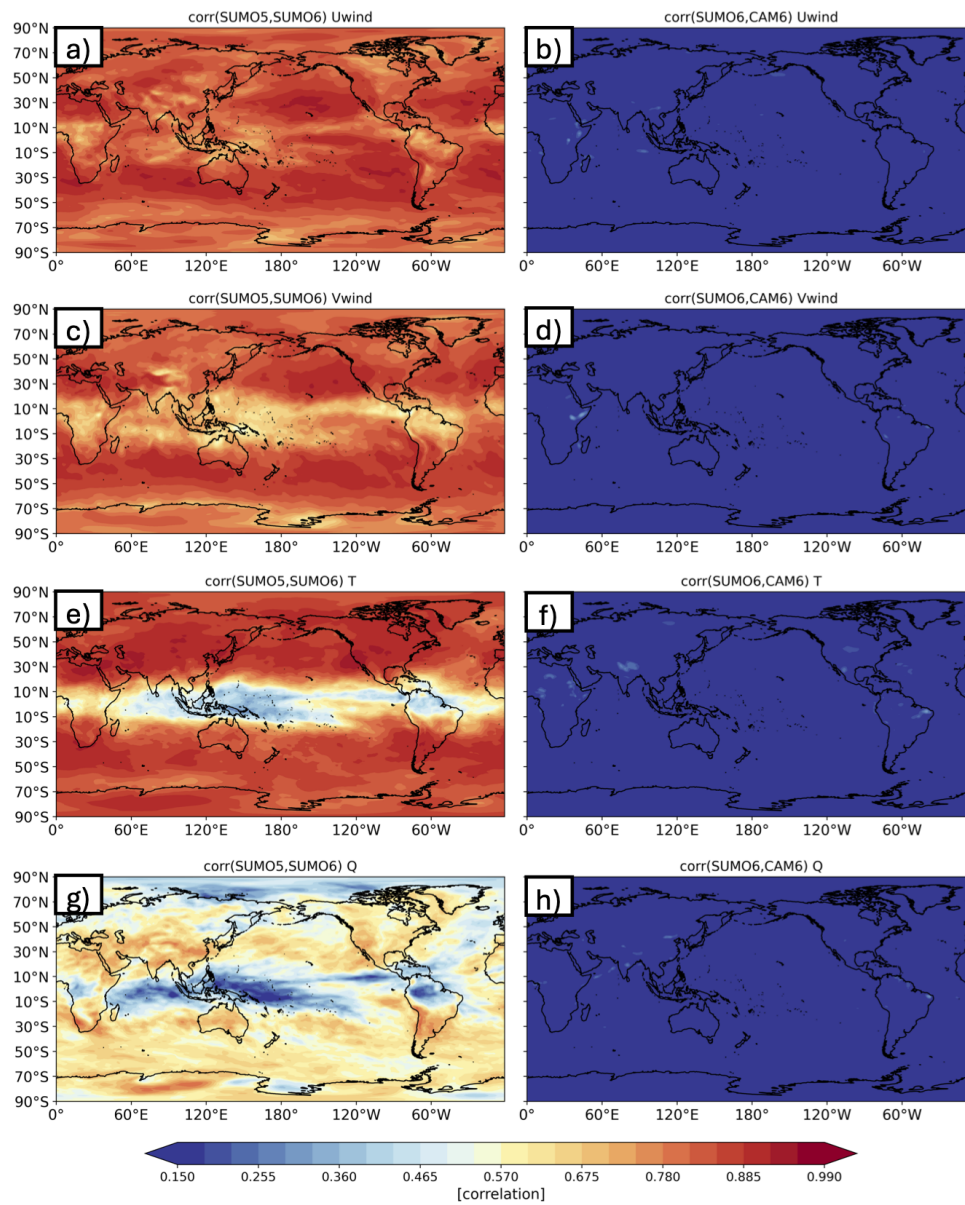

**Figure 1S.** As in Fig. 3. but 750mb

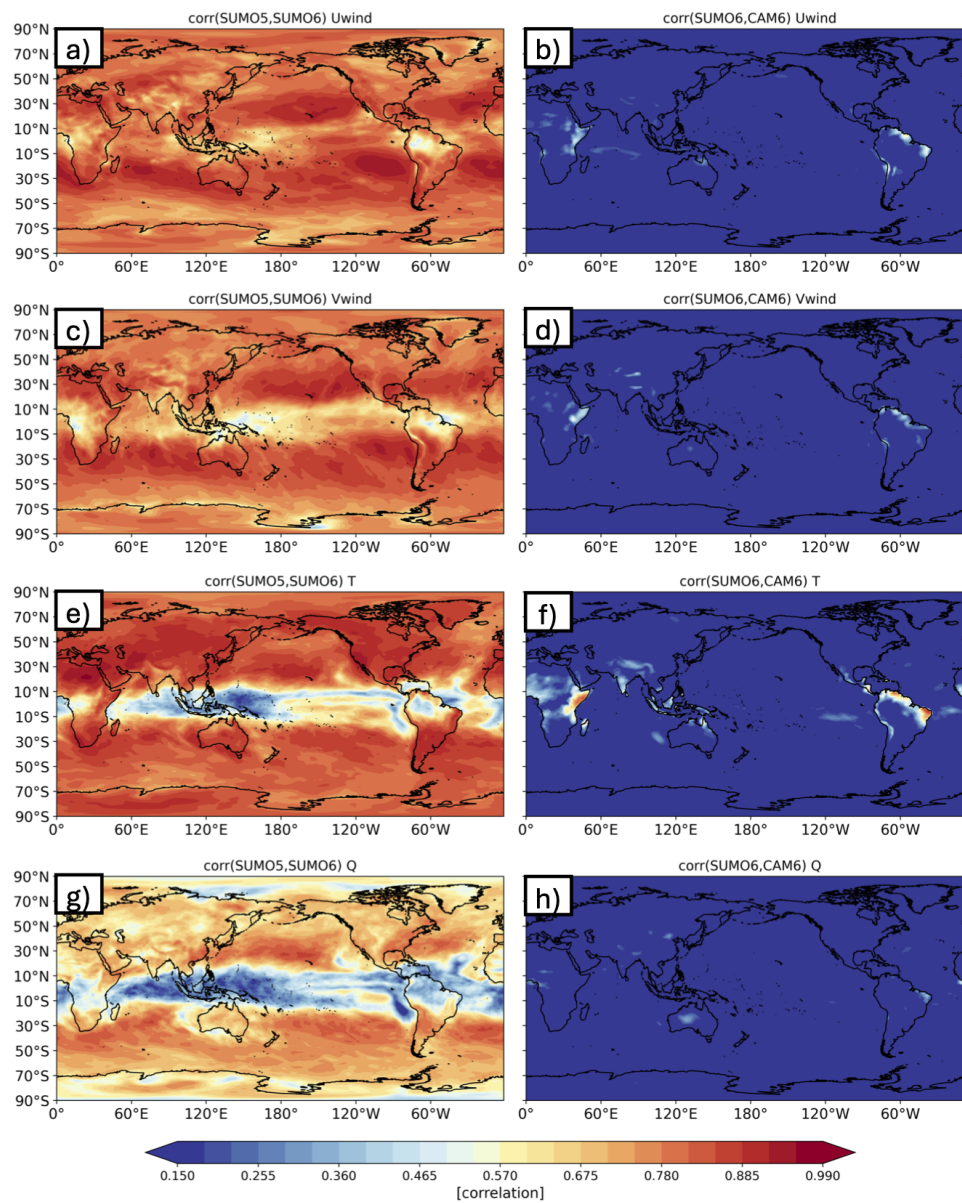

**Figure 2S.** As in Fig. 3. but 900mb

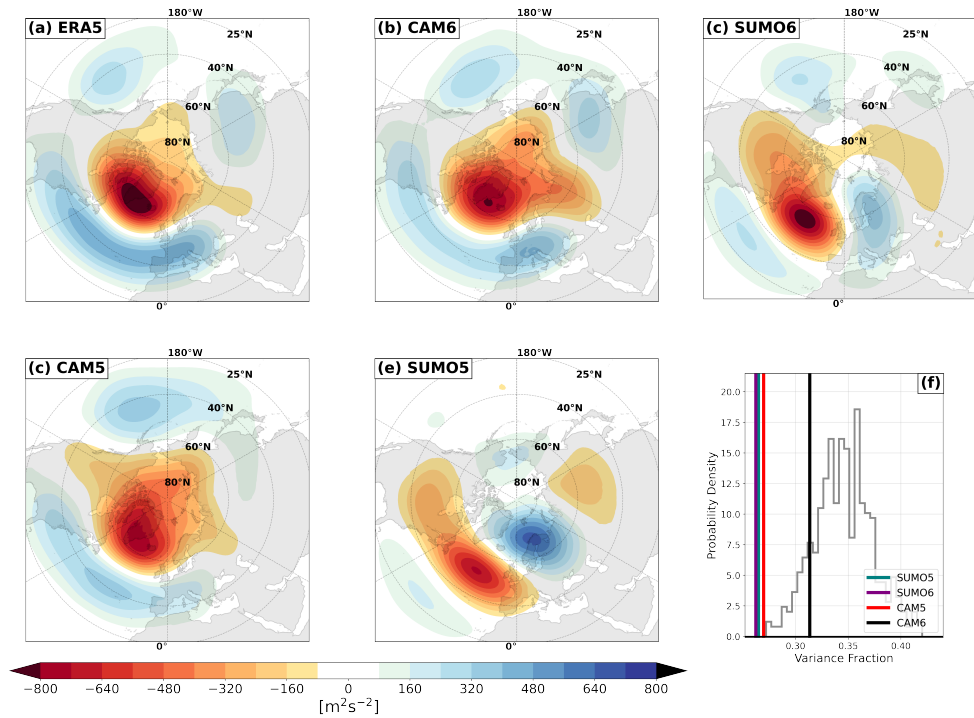

**Figure 3S.** As in Fig. 5. but for the North Atlantic Oscillation



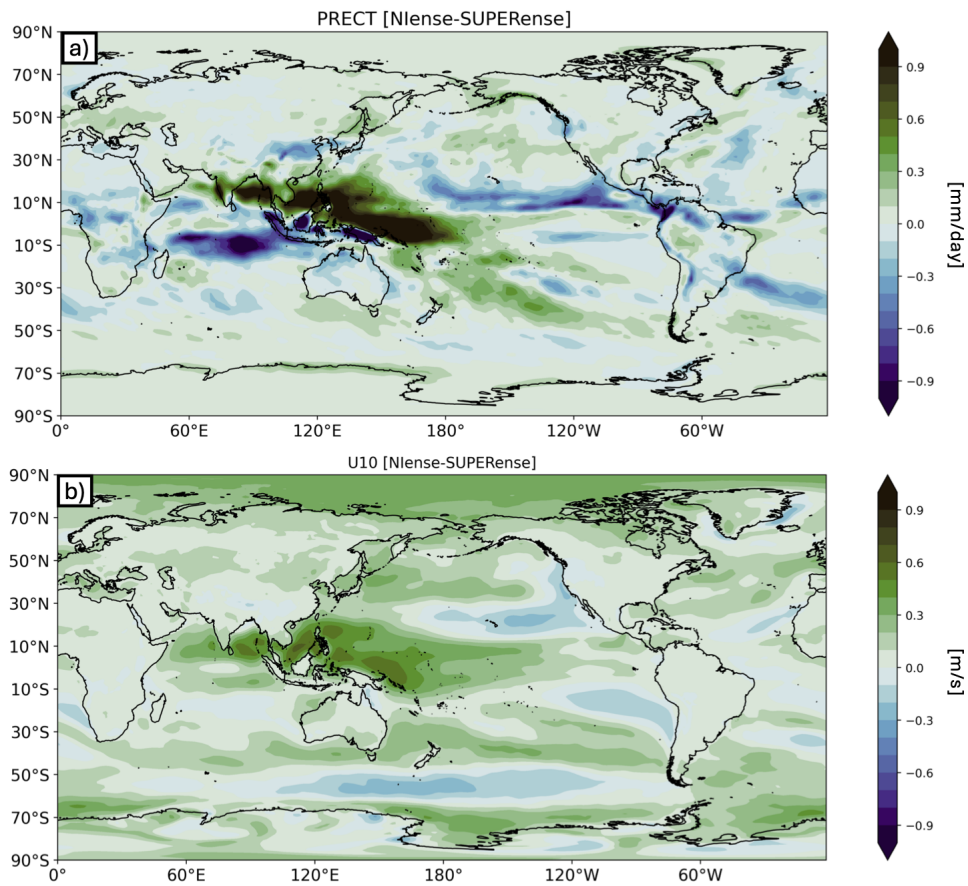

**Figure 4S.** Climatological difference between NIense and SUPERense for annual precipitation (a) and annual ten-meter winds (b).
